# Supplementary material for: Understanding the emergence of negative photoconductivity in CVD grown ReS2 thin films by invoking the trion generation mechanism
Source: Royal Society of Chemistry journal article supplement (doi:10.1039/d4nr02577f), 2024-01-01
Supplement: d4nr02577f1.pdf [file d4nr02577f1.pdf]

# Understanding the Emergence of Negative Photoconductivity in CVD grown ReS<sub>2</sub> thin Film

Sakshi Garg,<sup>a</sup> Abhishek Ghosh,<sup>a</sup> Pallavi Aggarwal,<sup>a</sup> Taslim Khan,<sup>a</sup> Sonika Singh,<sup>b</sup> Ashok Kapoor,<sup>a</sup> Rajendra Singh<sup>\* a,c</sup>

<sup>a</sup> Department of Physics, Indian Institute of Technology Delhi, Hauz Khas, New Delhi 110016, India.

<sup>b</sup> School of Interdisciplinary Research (SIRe), Indian Institute of Technology Delhi, Hauz Khas, New Delhi 110016, India.

<sup>c</sup> Department of Electrical Engineering, Indian Institute of Technology Delhi, Hauz Khas, New Delhi-110016, India.

\*Corresponding author

Email: rsingh@physics.iitd.ac.in

## **Growth of ReS<sub>2</sub> thin film over mica substrate**

To have the space confined growth mica micro reactor was used as substrate. A micro-reactor was created by stacking two (or more) freshly cleaved fluor phlogopite mica pieces. The two mica substrates adhered to one another firmly due to the electrostatic force between them and formed a space confined reaction space. The micro-reactor reduced the concentration of precursors, resulting in lower nucleation density and growth rate for ReS<sub>2</sub>. We define the bottom face of mica substrate as face 1, inside faces as face 2 and face 3 respectively, topmost face as face 4 as depicted in Figure S1b. Layer-by-layer growth of ReS<sub>2</sub> is facilitated by weak interlayer coupling. As seen in Figure S 1a, the layer number of 2D ReS<sub>2</sub> thin films can be controlled by varying the distances between the ReO<sub>3</sub> powder and the mica substrate. Initially, ReO<sub>3</sub> powder was placed at the center of a 5 cm long quartz boat and mica substrate was placed directly above the ReO<sub>3</sub> powder. Under this growth condition bilayer film deposition was achieved. To promote monolayer growth, we displace the substrate 0.5 cm right to the ReO<sub>3</sub> powder. The 0.5 cm shift reduced the ReO<sub>3</sub> flux to the substrate, resulting in the formation of a thinner film.

The enlarged view of mica micro reactor is depicted in Figure S1b. Face 1 exhibits consistent large-area monolayer ReS<sub>2</sub> growth, while face 2 shows scattered flake growth attributed to confined nucleation.

**Raman Spectral analysis.** There are three Raman active modes in ReS<sub>2</sub> A<sub>g</sub>-like, E<sub>g</sub>-like and C<sub>p</sub> modes due to in-plane vibration, out-of-plane vibrations and mixed vibration respectively.<sup>1,2</sup> Raman spectrum of ReS<sub>2</sub> exhibits two distinct segments, due to the significant difference in atomic masses between Re and S atoms. Raman spectra of ReS<sub>2</sub> film consisting of 13 first-order Raman active modes is depicted in Figure 1d of main paper. Raman mode below 250 cm<sup>-1</sup>, correspond to the motion of Re atoms, whereas vibrational modes above 250 cm<sup>-1</sup> indicate the vibrational behaviour of S atoms.<sup>3</sup> For Re atom in-plane vibration E<sub>g</sub> modes are observed at 150.0, 160.4, 212.0 and 233.8 cm<sup>-1</sup>.<sup>1</sup> The out-of-plane vibration A<sub>g</sub> modes of Re atoms were observed at 136.6 cm<sup>-1</sup>. For sulphur, E<sub>g</sub> modes appear at 305.5 cm<sup>-1</sup> and A<sub>g</sub> modes centered at 417.0 and 435.7 cm<sup>-1</sup>. The contracted vibration of the Re-S atom is located at 279.6 cm<sup>-1</sup>. Apart from these the mixed in-plane and out-of-plane vibrations of S atoms are centred at 320.2, 345.4, and 372.0 cm<sup>-1</sup>. All these findings are consistent with the literature and tabulated in table S1, therefore support the synthesis of the 1T'-phase of ReS<sub>2</sub>.<sup>4</sup>

## **Supporting note 5**

### **Supplementary results**

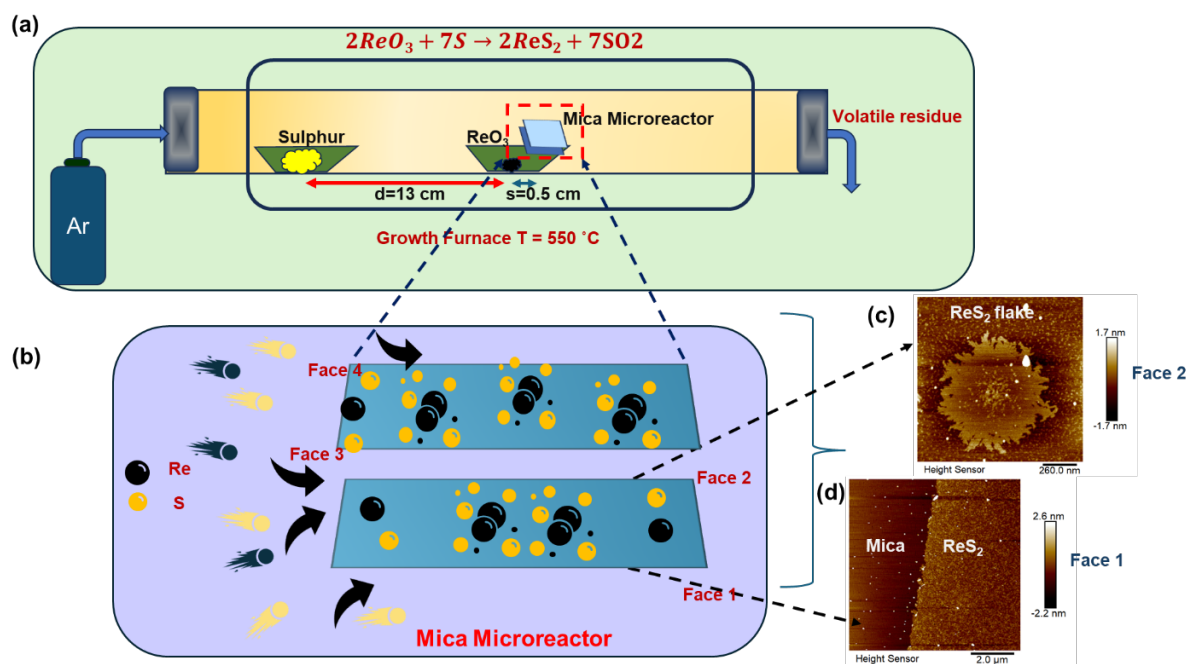

Figure S1. Schematic of CVD grown  $\text{ReS}_2$  using mica microreactor as substrate. (b) Enlarged view of the confined space reaction on the mica surface. (c) Monolayer flake growth on face 2. (d) Large area monolayer growth on face 1

| Symmetry    | Vibrations                                            | Literature Raman shift ( $\text{cm}^{-1}$ ) | Experimental ( $\text{cm}^{-1}$ ) | FWHM ( $\text{cm}^{-1}$ ) |
|-------------|-------------------------------------------------------|---------------------------------------------|-----------------------------------|---------------------------|
| $A_g$ -like | Out-of-plane vibration of Re atoms                    | 140.3                                       | <b>136.6</b>                      | <b>10.8</b>               |
| $A_g$ -like | Out-of-plane vibration of Re atoms                    | 145.9                                       |                                   |                           |
| $E_g$ -like | In-plane vibration of Re atoms                        | 153.1                                       | <b>150</b>                        | <b>6.4</b>                |
| $E_g$ -like | In-plane vibration of Re atoms                        | 163.6                                       | <b>160.4</b>                      | <b>4.9</b>                |
| $E_g$ -like | In-plane vibration of Re atoms                        | 217.2                                       | <b>212</b>                        | <b>6.4</b>                |
| $E_g$ -like | In-plane vibration of Re atoms                        | 237.1                                       | <b>233.8</b>                      | <b>6.6</b>                |
| $C_p$       | In-plane and out-of-plane vibration of Re and S atoms | 278.3                                       | <b>277.4</b>                      | <b>13.4</b>               |
| $C_p$       | In-plane and out-of-plane vibration of Re and S atoms | 282.6                                       |                                   |                           |
| $E_g$ -like | In-plane vibration of S atoms                         | 307.8                                       | <b>305.5</b>                      | <b>10.4</b>               |
| $E_g$ -like | In-plane vibration of S atoms                         | 311.0                                       |                                   |                           |
| $C_p$       | In-plane and out-of-plane vibration of S atoms        | 320.6                                       | <b>320.2</b>                      | <b>9.0</b>                |
| $C_p$       | In-plane and out-of-plane vibration of S atoms        | 324.9                                       |                                   |                           |
| $C_p$       | In-plane and out-of-plane vibration of S atoms        | 348.8                                       | <b>345.4</b>                      | <b>7.0</b>                |
| $C_p$       | In-plane and out-of-plane vibration of S atoms        | 368.9                                       | <b>372</b>                        | <b>12</b>                 |
| $C_p$       | In-plane and out-of-plane vibration of S atoms        | 377.9                                       |                                   |                           |
| $C_p$       | In-plane and out-of-plane vibration of S atoms        | 407.3                                       | <b>405.5</b>                      | <b>8.4</b>                |
| $A_g$ -like | Out-of-plane vibration of S atoms                     | 418.7                                       | <b>417</b>                        | <b>5.9</b>                |
| $A_g$ -like | Out-of-plane vibration of S atoms                     | 438.0                                       | <b>435.7</b>                      | <b>8.5</b>                |

Table S1. Comparison of experimental findings of Raman modes with reported literature.

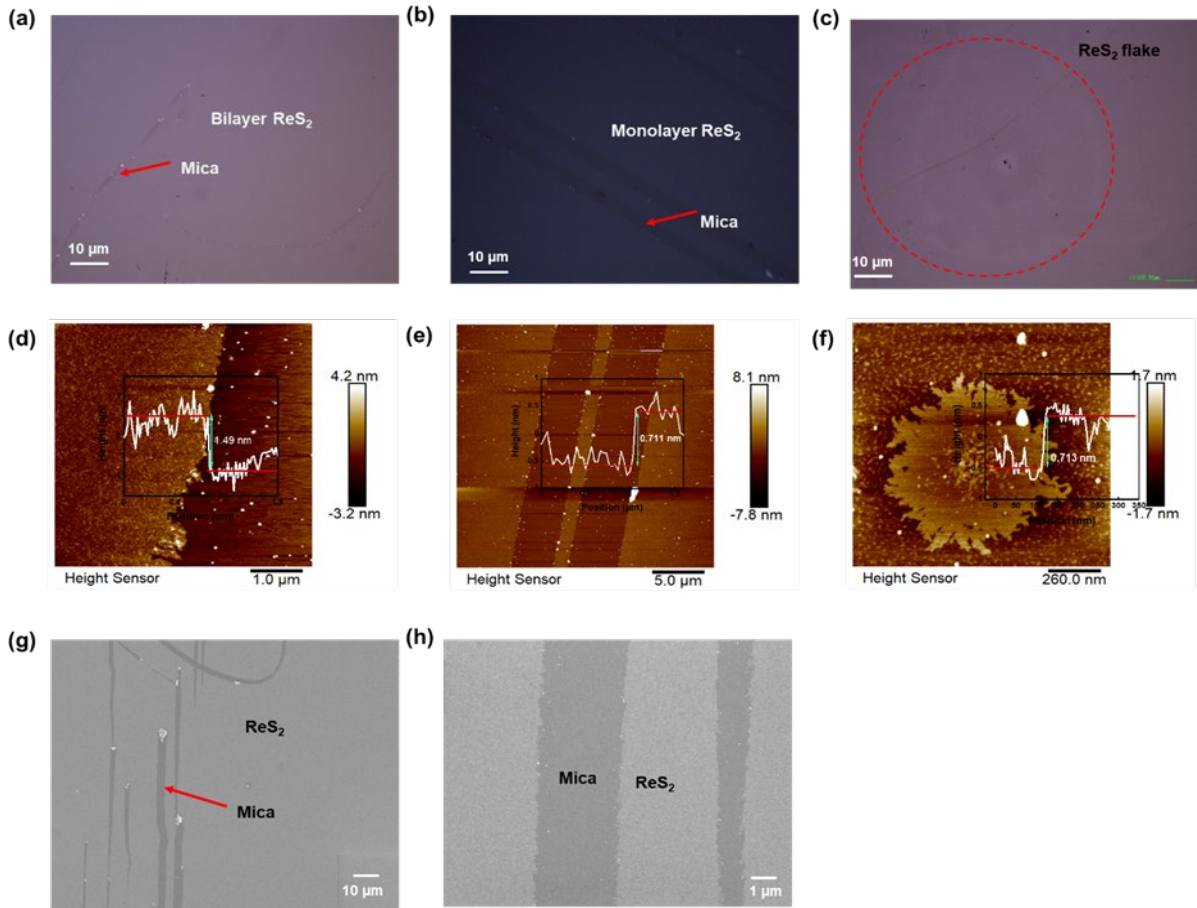

Figure S2. Optical microscopy (OM) images of (a) continuous ReS<sub>2</sub> film (b) Film grown on face1 and (c) Flake growth on face2 over mica substrate. Mica substrate can be easily distinguished through color contrast shown via red arrow. (d-f) AFM images with height profile intact over the step indicate the growth of bilayer and monolayer film (g), (h) FESEM image of as grown ReS<sub>2</sub> indicates the smooth and larger area growth.

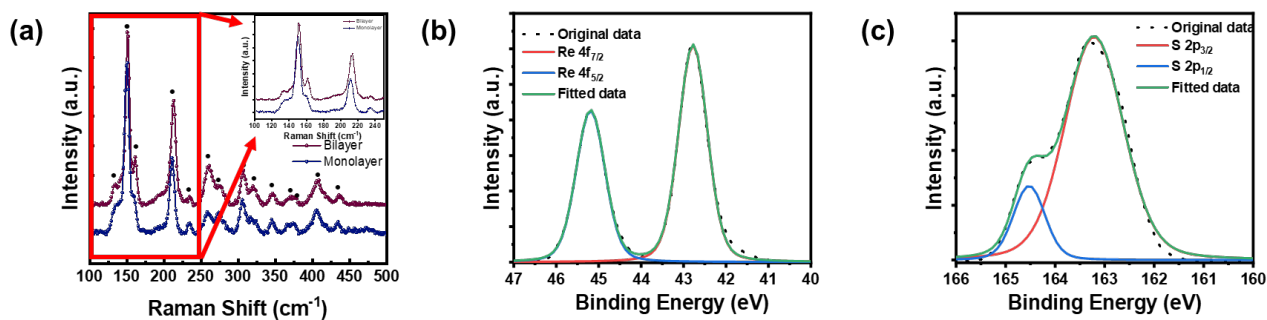

Figure S3. (a) Raman spectra of monolayer and bilayer  $\text{ReS}_2$  film grown over mica substrate. Inset shows the magnified Raman spectra of characteristics modes of  $\text{ReS}_2$ . (b) and (c) Core level spectra of Re and S atoms.

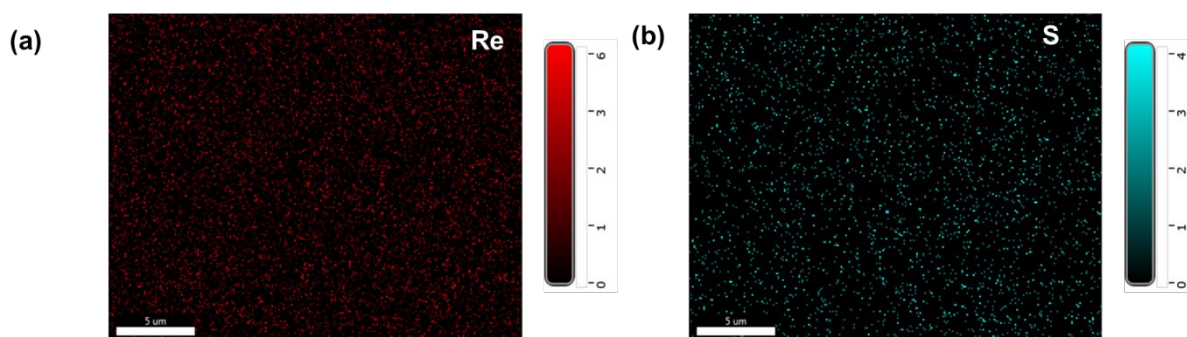

Figure S4. EDX map of as grown  $\text{ReS}_2$  film with the scale bar ( $5\mu\text{m}$ ). Indicates the uniform film formation over large area.

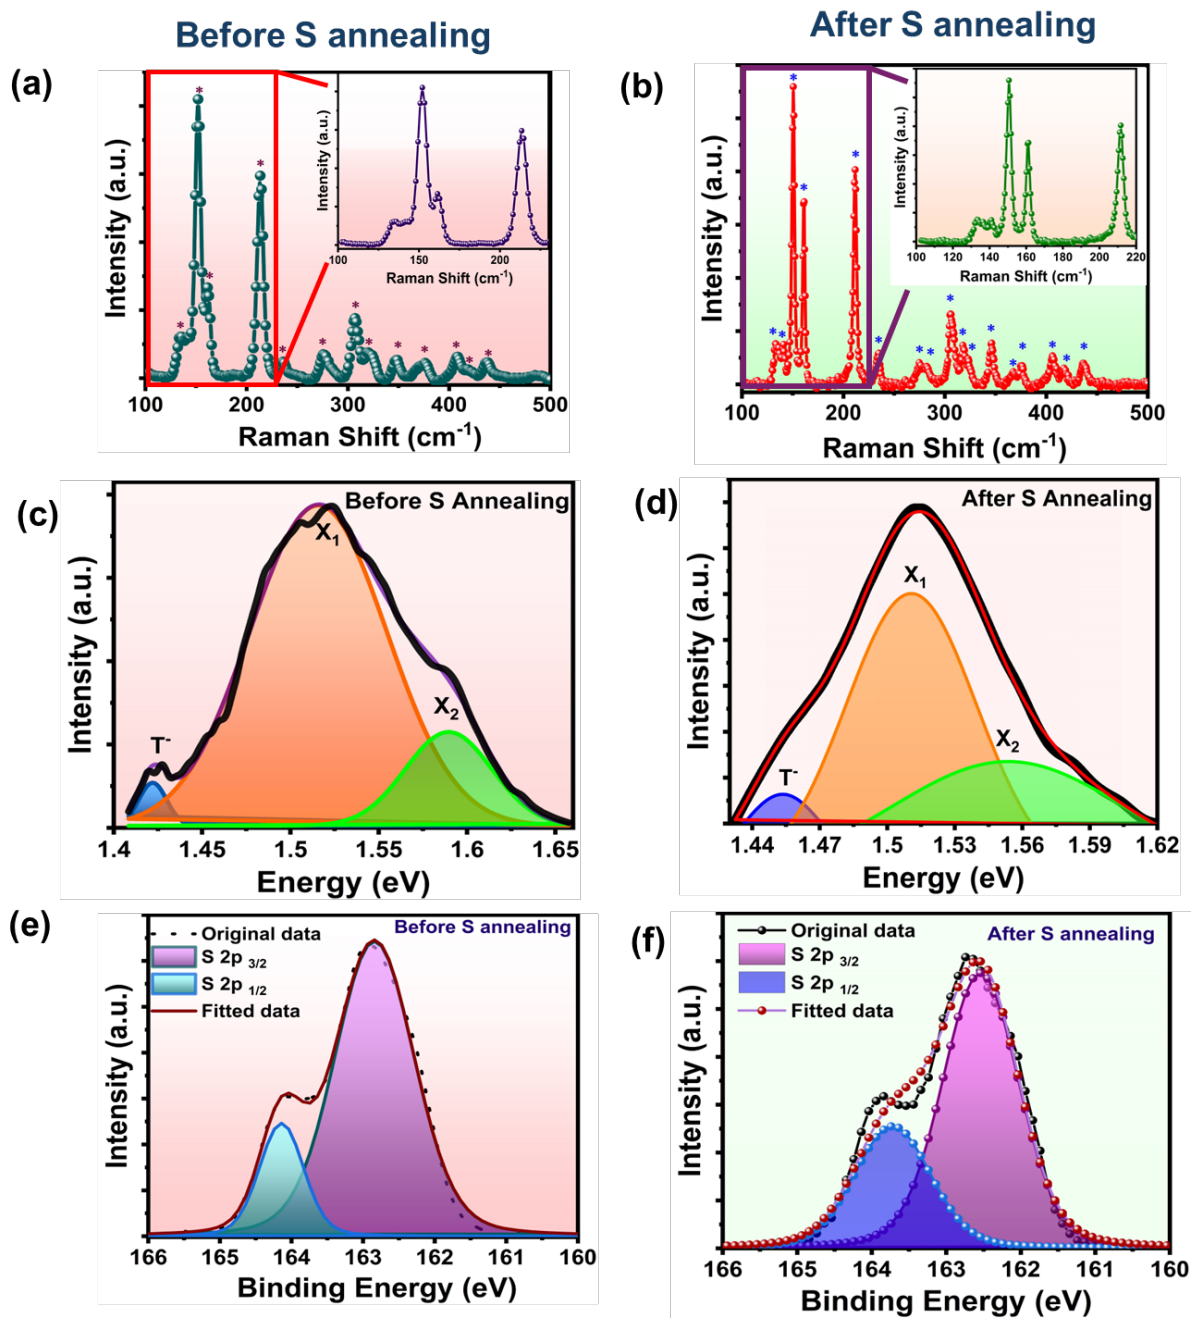

Figure S5. Comparison Raman, PL and XPS spectra before and after S annealing

## References

- 1 Z. Guo, A. Wei, Y. Zhao, L. Tao, Y. Yang, Z. Zheng, D. Luo, J. Liu and J. Li, *Appl. Phys. Lett.*, 2019, **114**, 153102.
- 2 P. P. Satheesh, H. S. Jang, B. Pandit, S. Chandramohan and K. Heo, *Adv. Funct. Mater.*, 2023, **33**, 2212167.
- 3 S. Tongay, H. Sahin, C. Ko, A. Luce, W. Fan, K. Liu, J. Zhou, Y. S. Huang, C. H. Ho, J. Yan, D. F. Ogletree, S. Aloni, J. Ji, S. Li, J. Li, F. M. Peeters and J. Wu, *Nat. Commun.*, 2014, **5**, 3252.
- 4 Y. Feng, W. Zhou, Y. Wang, J. Zhou, E. Liu, Y. Fu, Z. Ni, X. Wu, H. Yuan, F. Miao, B. Wang, X. Wan and D. Xing, *Phys. Rev. B - Condens. Matter Mater. Phys.*, 2015, **92**, 054110.
